# Supplementary material for: Fibrin Networks Regulate Protein Transport during Thrombus Development
Source: PLOS journal article supplement (doi:10.1371/journal.pcbi.1003095), 2013-06-13
Supplement: S4 (10.1371/journal.pcbi.1003095.s004) [file journal.pcbi.1003095.s004]

301 Moved Permanently

# Moved Permanently

The document has moved here.

---

Apache Server at www.ploscompbiol.org Port 80
